# Supplementary material for: Technical note: RA138 Calcite U-Pb LA-ICP-MS primary reference material
Source: Copernicus journal article supplement (doi:10.5194/gchron-2024-7), 2024-03-06
Supplement: Supplementary file 1 [file gchron-2024-7-supplement.zip]

Supplementary Material

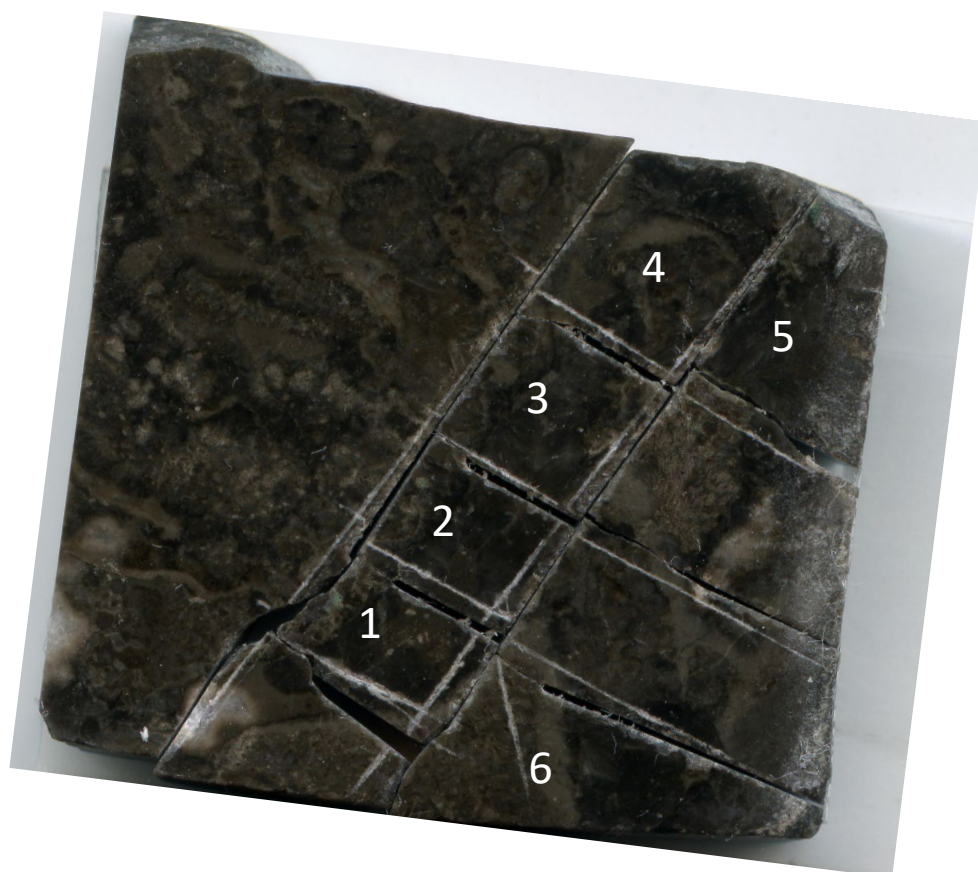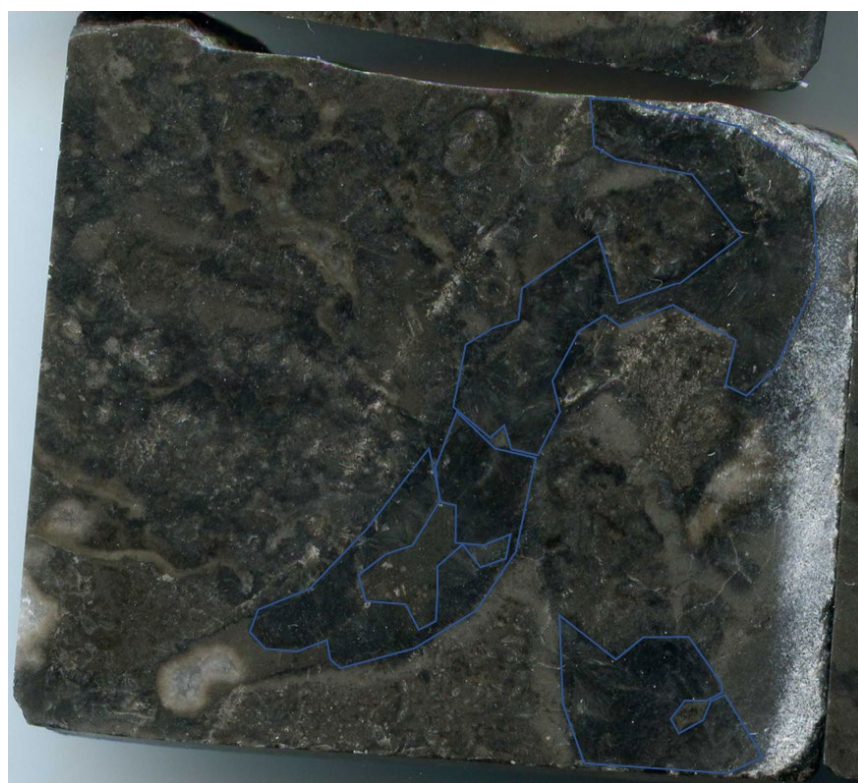

Figure S1: RA138-D1 -Pieces and region of Cement C1 (no CL). Size ~30 x 25 mm

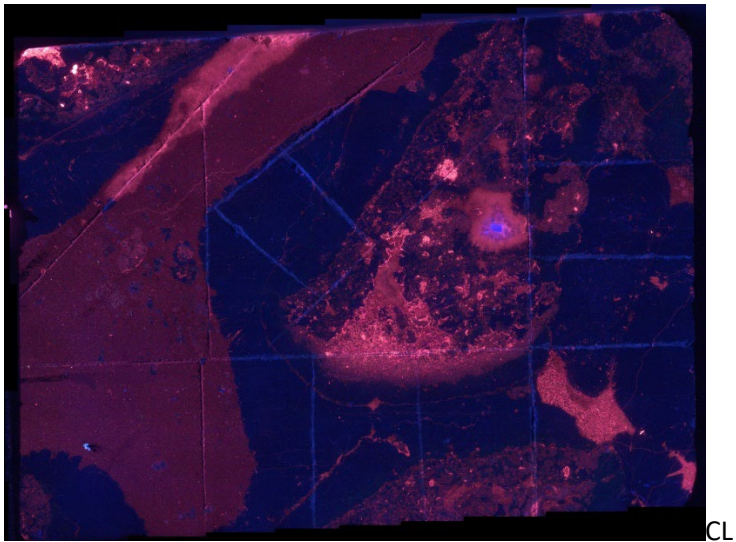

CL

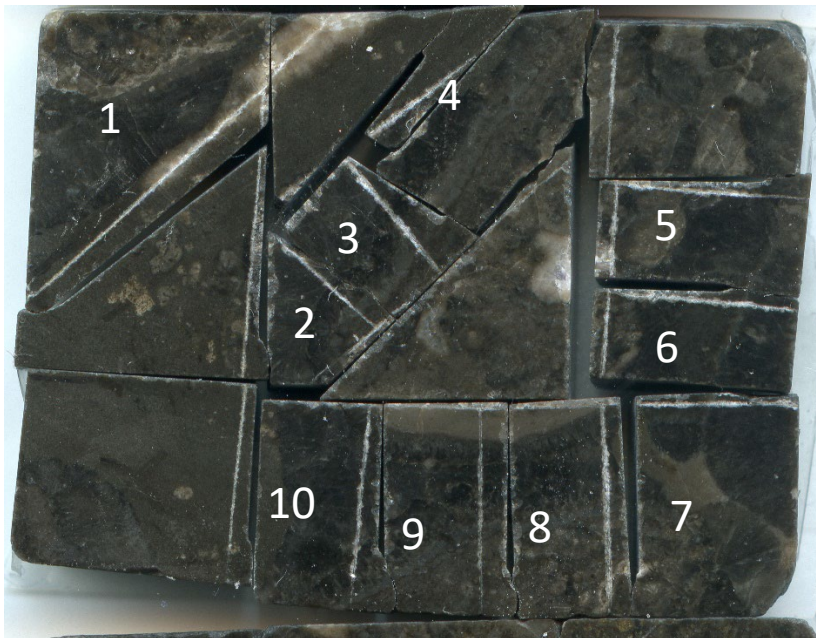

cut

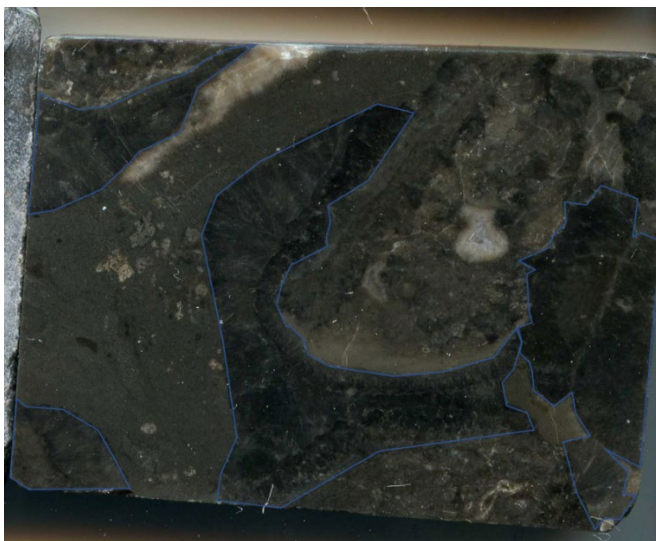

photo

Figure S2: RA138-D2 -CL, Pieces and region of Cement C1 Size ~30 mm x 25 mm



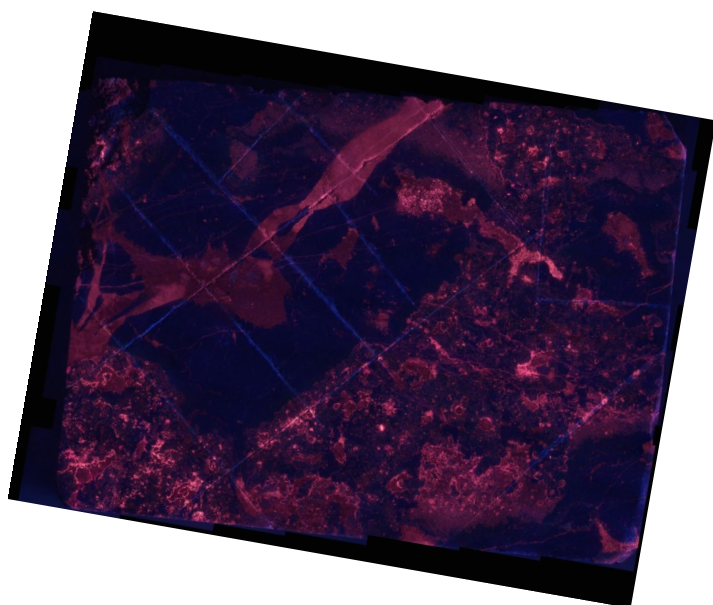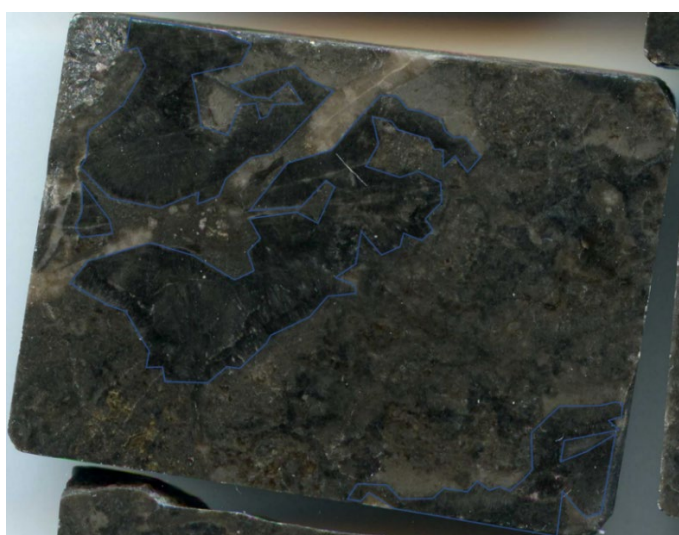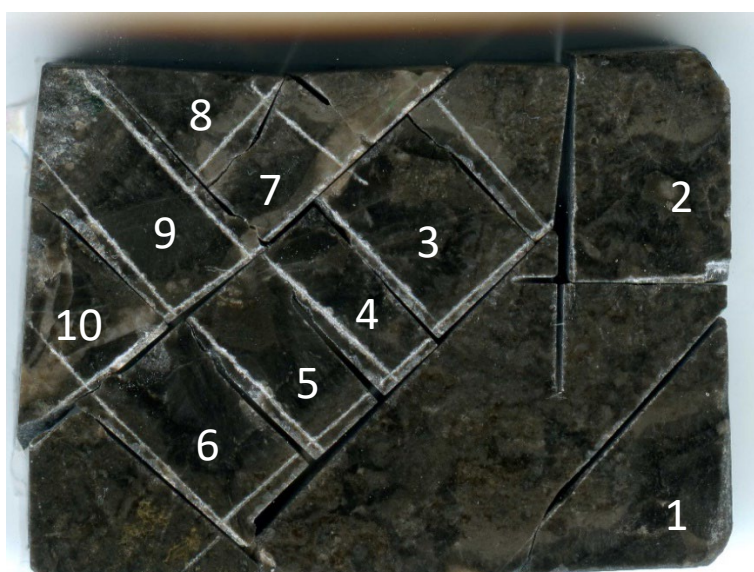

Figure S3: RA138-D5 -CL, regions of cement C1 and Pieces. Size ~30 mm x 25 mm



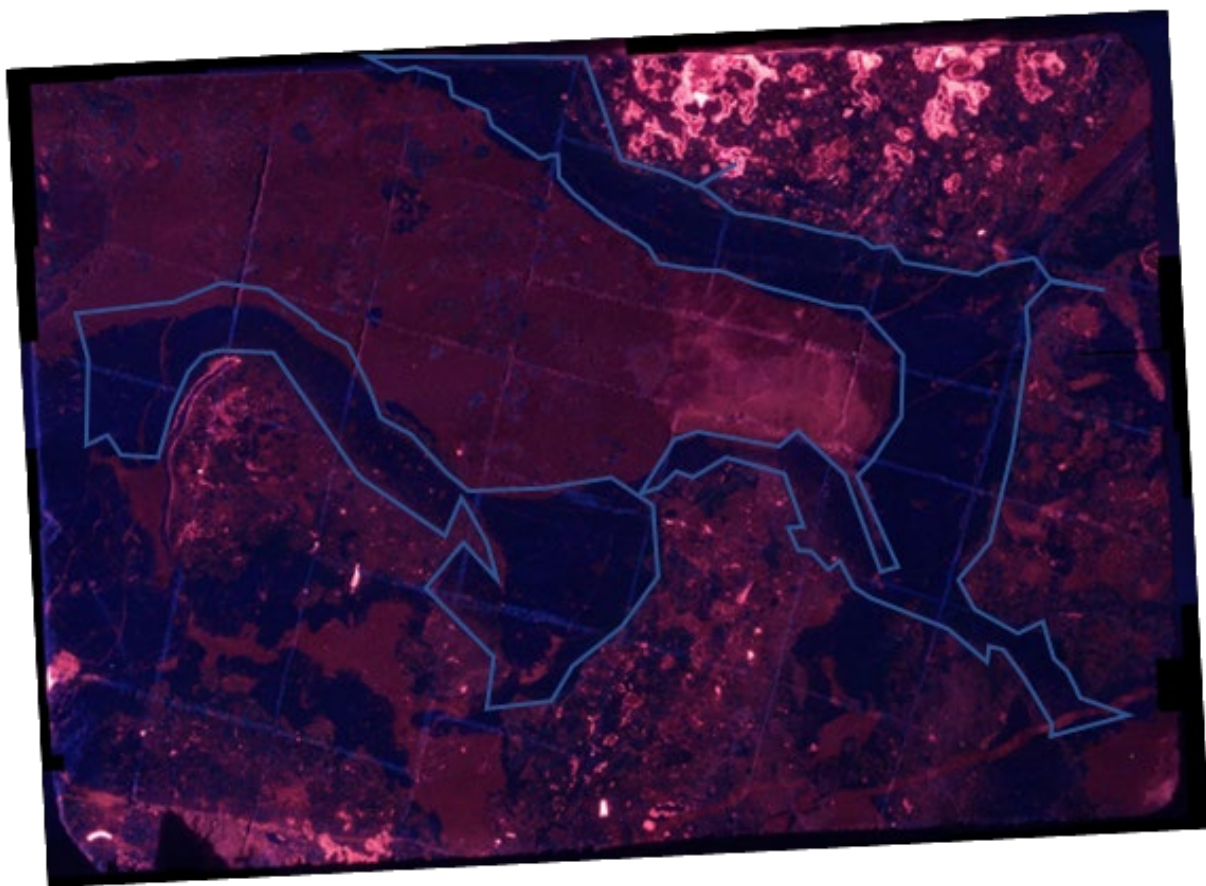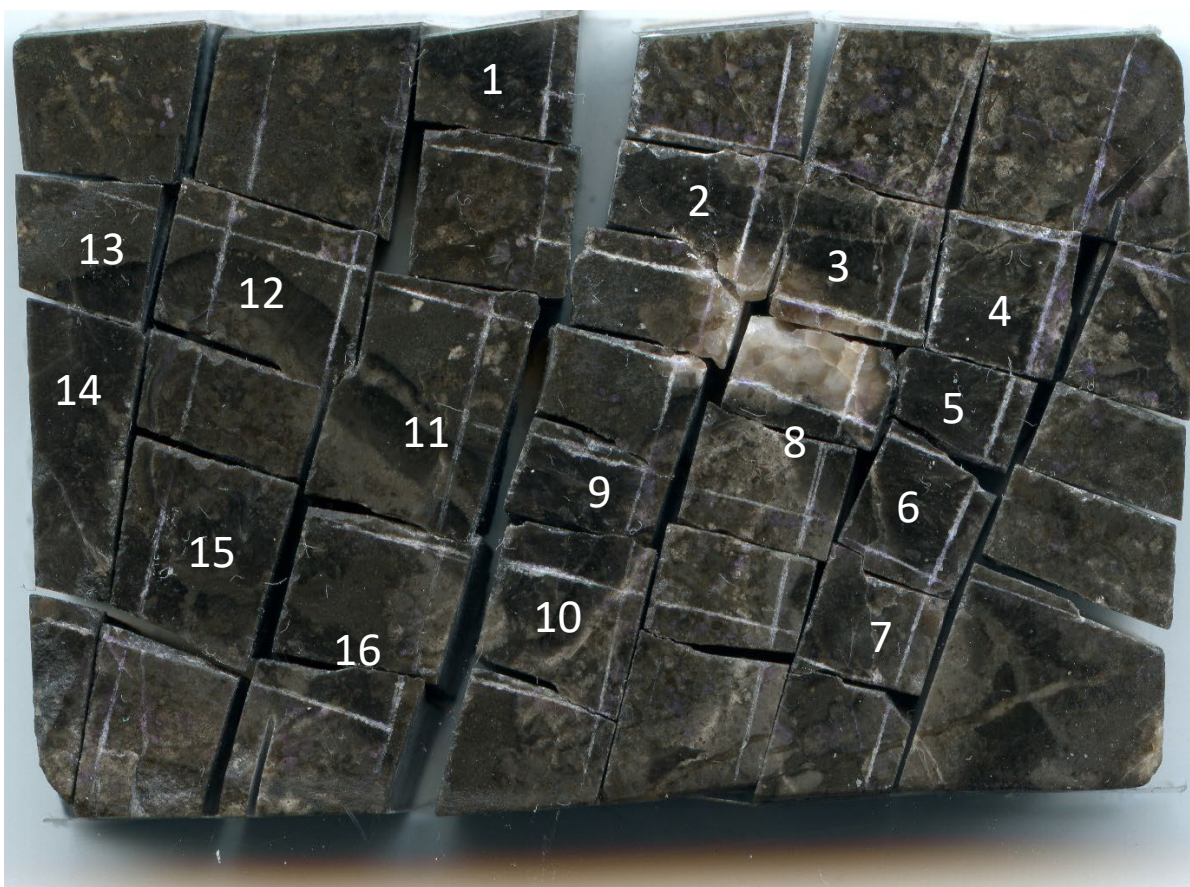

Figure S4: RA138-D14 -CL with regions of cement C1 and Pieces. Size ~ Size ~40 x 30 mm



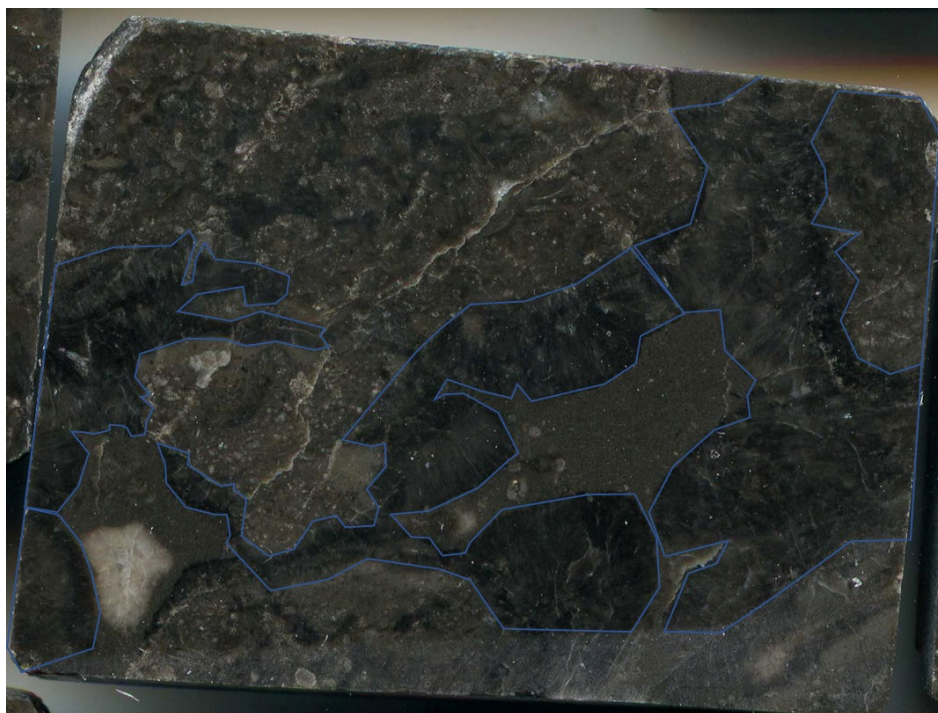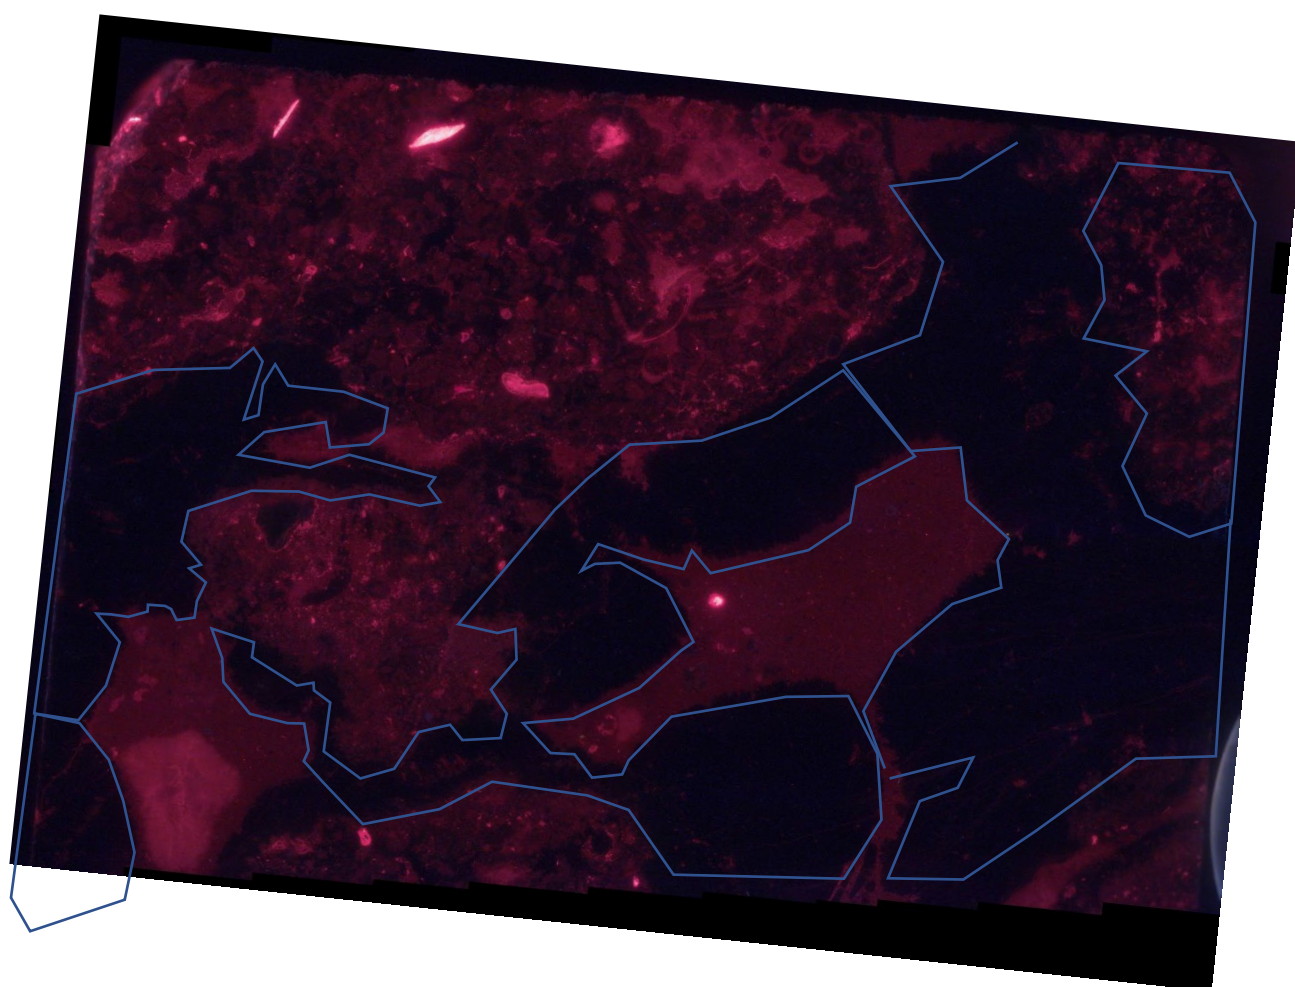

Figure S5: RA138-D10 -CL with regions of cement C1. Size ~ Size ~35 x 25 mm



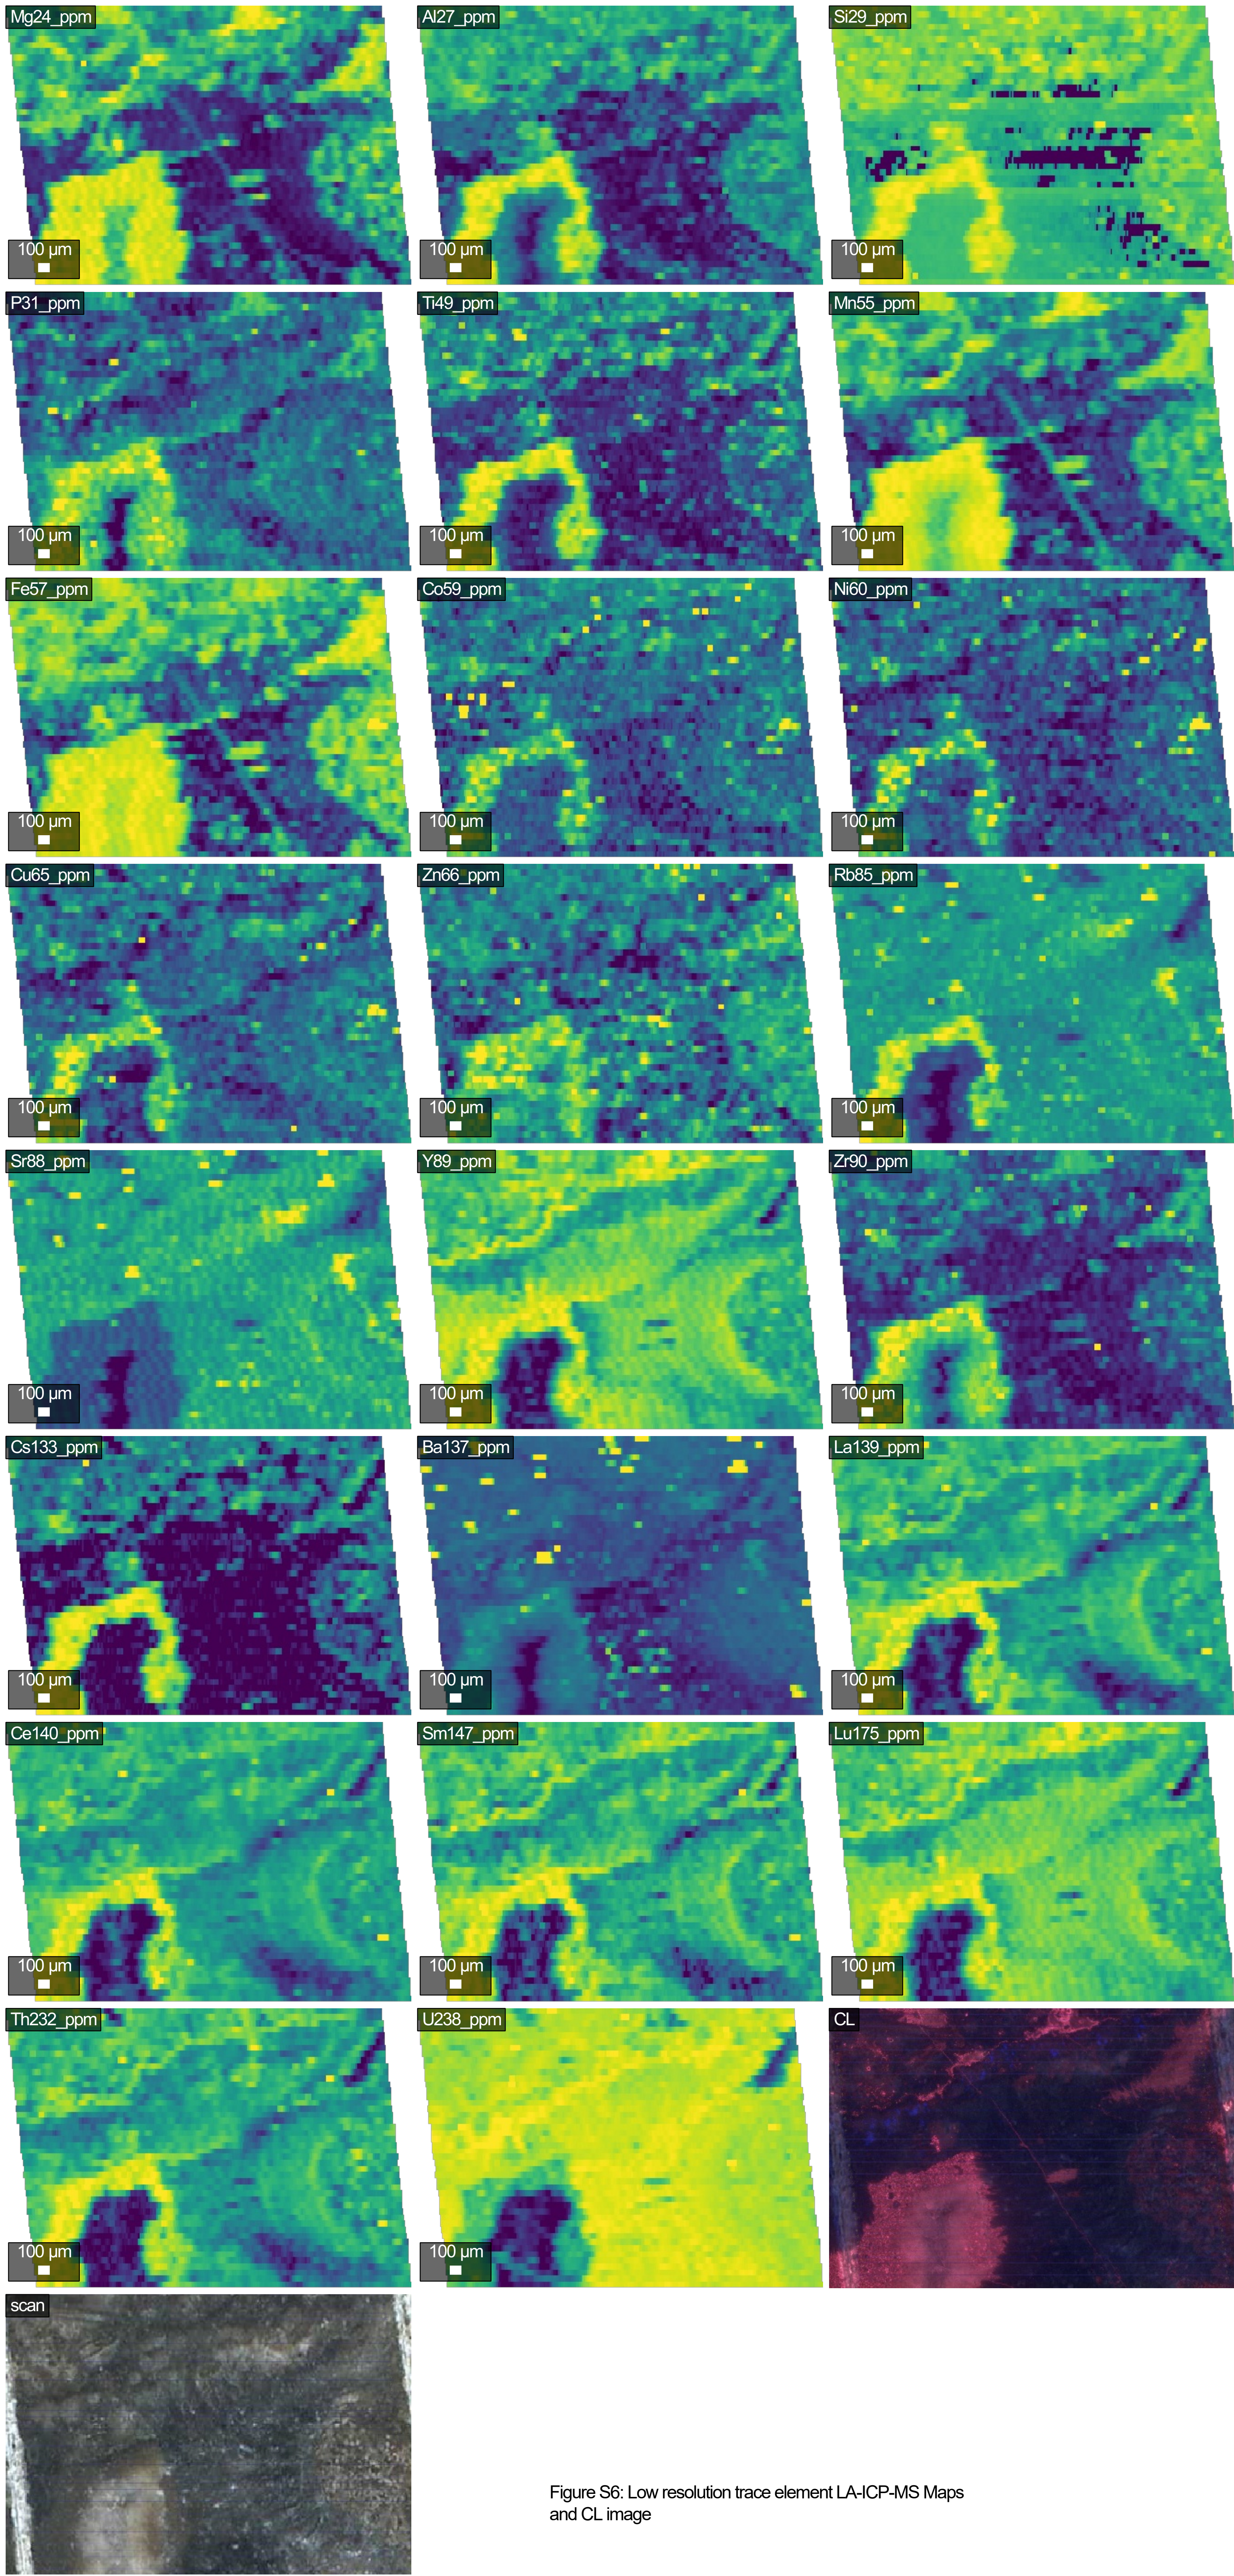

Figure S6: Low resolution trace element LA-ICP-MS Maps and CL image



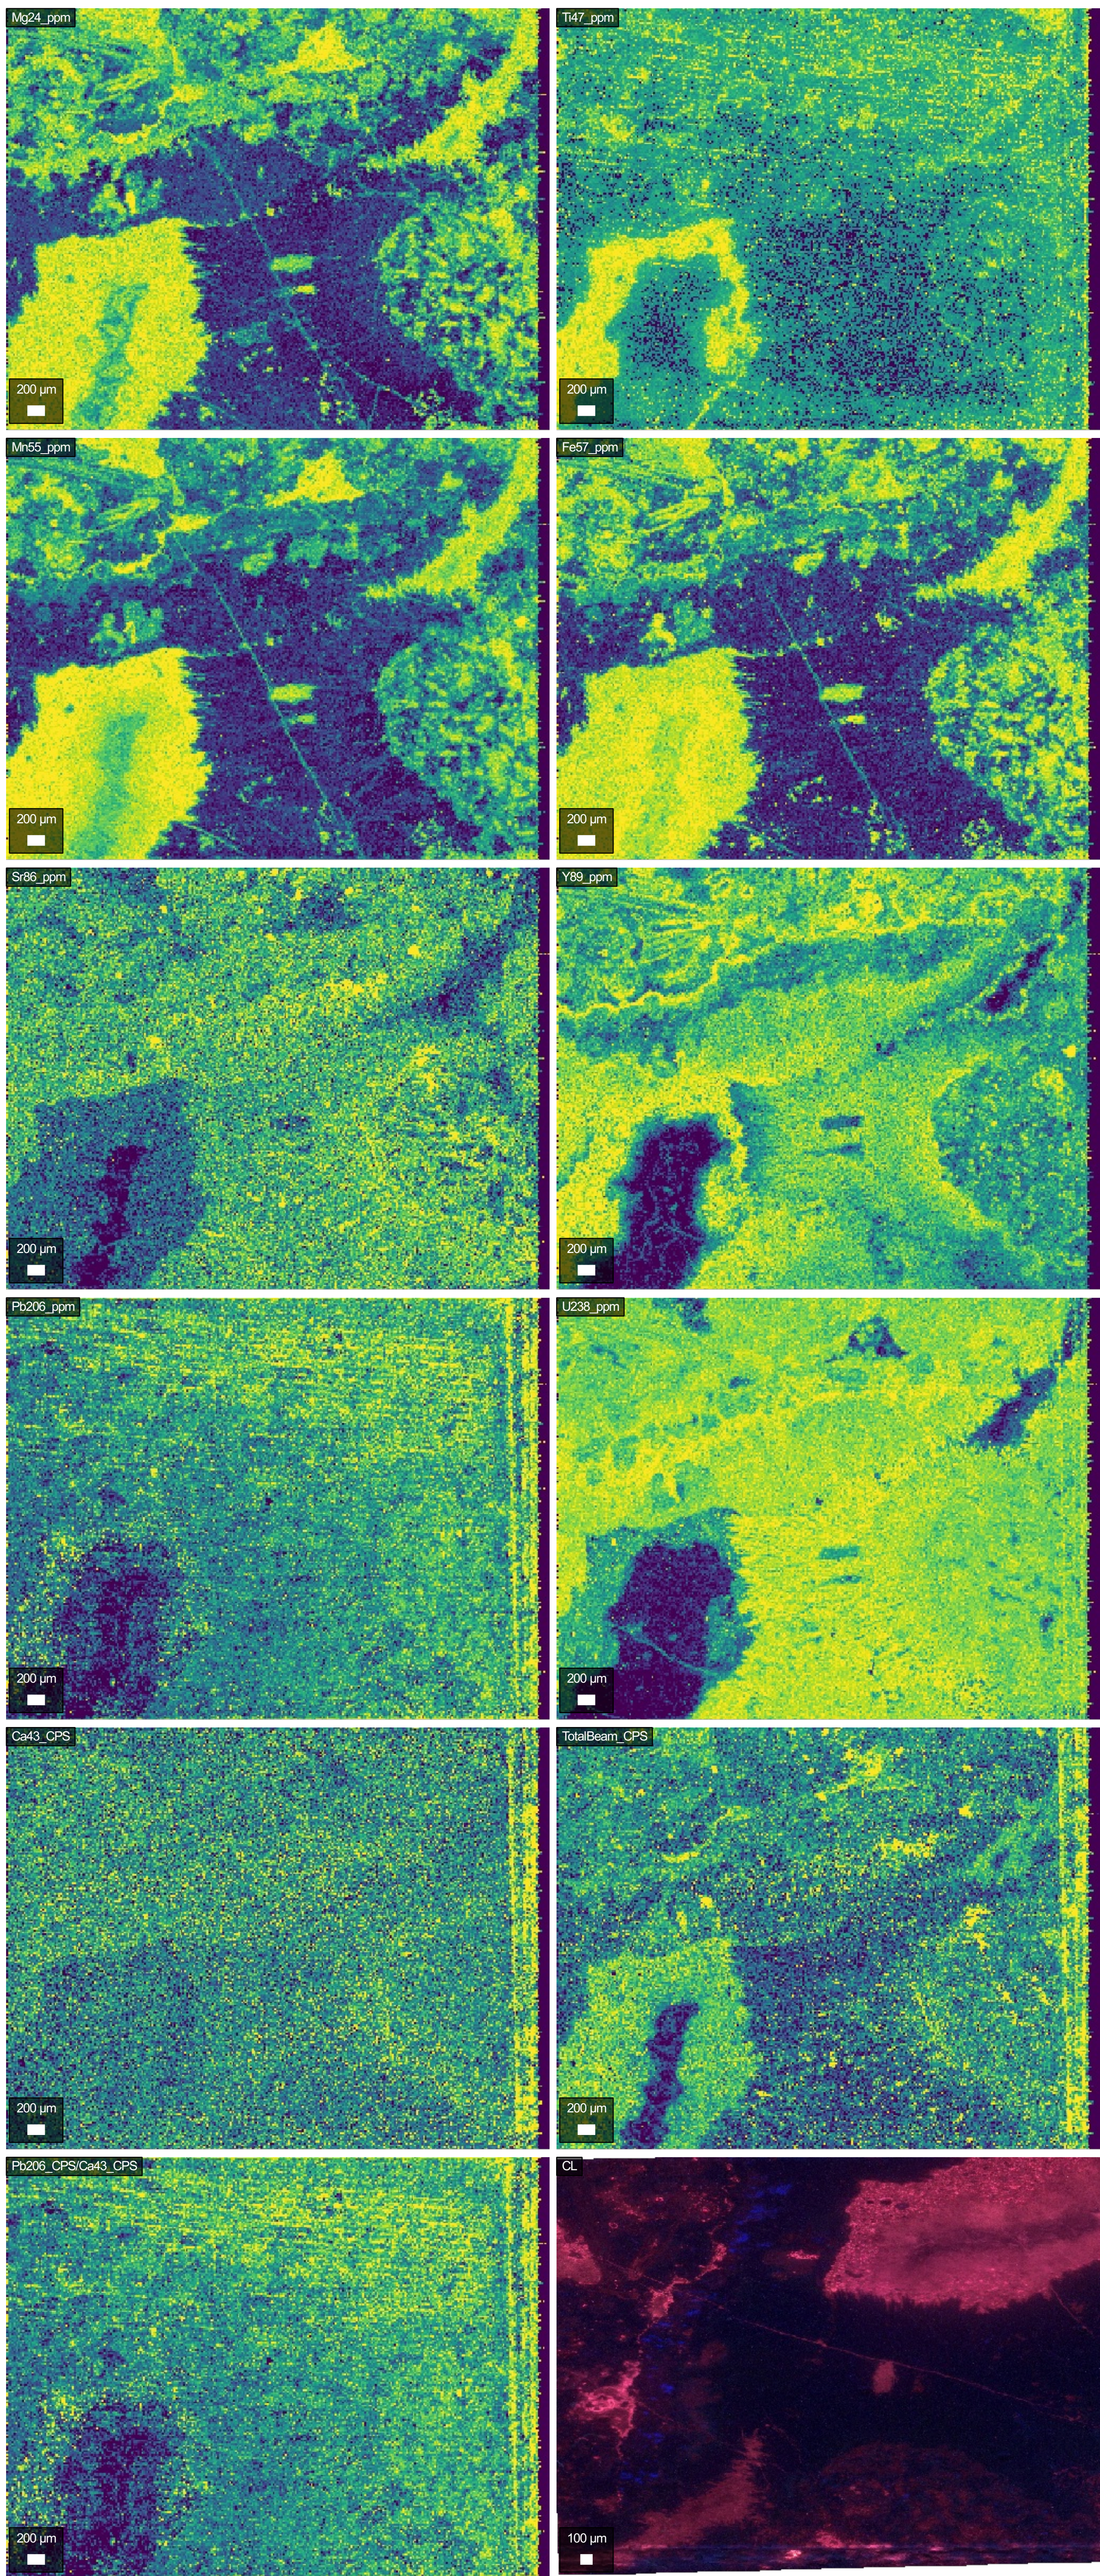

Figure S7: High resolution trace element LA-ICP-MS maps and CL image
